# Supplementary material for: Elucidating the cellular adaptive response of Coccomyxa sp. upon exposure to PVC-nanoplastics (PVC-NPs) for production of bioenergy molecules
Source: Royal Society of Chemistry journal article supplement (doi:10.1039/d5en00863h), 2026-01-01
Supplement: d5en00863h1.pdf [file d5en00863h1.pdf]

### **Data Availability Statement**

Supplementary information: Cultures of *Coccomyxa* sp. in presence of different concentrations of PVC-NPs (0, 10, 50, and 100 ppm) with pronounced aggregation in 100 ppm culture (Fig. S1A and B), Growth curve of *Coccomyxa* sp. under different PVC-NPs concentrations (cell count based) (Fig. S2), EDX images of control and PVC-NPs treated cells (Fig. S3), Nile red images (Fig. S4), BBM media composition (Table S1), Trace metal stock composition (Table S2), Characterization of PVC-NPs in BBM media.(Table S3), Growth Inhibition percentage (IR) in different PVC-NPs concentrations (0, 10, 50, and 100 ppm) (Table S4), Impact of EPS (obtained from *Coccomyxa* sp. IITRSTKM4) exposure on PVC-NPs (Table S5) are provided in the supplementary document (PDF).
